# Supplementary material for: Comparison of Antimicrobial Resistances in Escherichia coli from Conventionally and Organic Farmed Poultry from Germany
Source: MDPI journal article supplement (doi:10.3390/antibiotics11101282), 2022-09-21
Supplement: s1 [file s1]

**Table S1.** Association of resistance with production system and matrix using logistic regression\*

| Substance        | Category       | p-value | Odds ratio | Lower 95% C.I.<br>for EXP(B) | Upper 95% C.I.<br>for EXP(B) |
|------------------|----------------|---------|------------|------------------------------|------------------------------|
| Ampicillin       | org_conv       | <.001   | 3.62712    | 2.542                        | 5.175                        |
|                  | Source         | .625    |            |                              |                              |
|                  | Turkey at farm | .512    | .887       | .620                         | 1.269                        |
|                  | Turkey meat    | .351    | .850       | .604                         | 1.196                        |
|                  | Constant       | <.001   | 2.211      |                              |                              |
| Azithromycin     | org_conv       | .294    | 3.074      | .378                         | 25.037                       |
|                  | Source         | .438    |            |                              |                              |
|                  | Turkey at farm | .336    | 1.802      | .543                         | 5.982                        |
|                  | Turkey meat    | .740    | .779       | .178                         | 3.405                        |
|                  | Constant       | <.001   | .016       |                              |                              |
| Chloraphenicol   | org_conv       | .002    | 2.385      | 1.370                        | 4.153                        |
|                  | Source         | <.001   |            |                              |                              |
|                  | Turkey at farm | <.001   | 3.183      | 1.856                        | 5.459                        |
|                  | Turkey meat    | <.001   | 3.57       | 2.104                        | 6.057                        |
|                  | Constant       | <.001   | .079       |                              |                              |
| Ciprofloxacin    | org_conv       | <.001   | 3.346      | 2.163                        | 5.177                        |
|                  | Source         | .112    |            |                              |                              |
|                  | Turkey at farm | .058    | .709       | .497                         | 1.012                        |
|                  | Turkey meat    | .116    | .758       | .537                         | 1.071                        |
|                  | Constant       | .023    | .773       |                              |                              |
| Colistin         | org_conv       | .049    | 2.315      | 1.004                        | 5.338                        |
|                  | Source         | .969    |            |                              |                              |
|                  | Turkey at farm | .839    | 1.068      | .568                         | 2.008                        |
|                  | Turkey meat    | .962    | .985       | .523                         | 1.854                        |
|                  | Constant       | <.001   | .086       |                              |                              |
| Cefotaxime       | org_conv       | .491    | .690       | .240                         | 1.983                        |
|                  | Source         | .713    |            |                              |                              |
|                  | Turkey at farm | .575    | 1.431      | .409                         | 5.006                        |
|                  | Turkey meat    | .418    | 1.621      | .503                         | 5.222                        |
|                  | Constant       | .000    | .021       |                              |                              |
| Gentamicin       | org_conv       | .188    | 1.802      | .749                         | 4.334                        |
|                  | Source         | .005    |            |                              |                              |
|                  | Turkey at farm | .046    | 3.027      | 1.020                        | 8.982                        |
|                  | Turkey meat    | .001    | 5.243      | 1.910                        | 14.388                       |
|                  | Constant       | <.001   | .016       |                              |                              |
| Nalidixic acid   | org_conv       | <.001   | 2.683      | 1.664                        | 4.325                        |
|                  | Source         | <.001   |            |                              |                              |
|                  | Turkey at farm | <.001   | .451       | .307                         | .664                         |
|                  | Turkey meat    | <.001   | .485       | .335                         | .702                         |
|                  | Constant       | .001    | .679       |                              |                              |
| Sulfamethoxazole | org_conv       | <.001   | 4.272      | 2.778                        | 6.568                        |
|                  | Source         | <.001   |            |                              |                              |
|                  | Turkey at farm | <.001   | .435       | .305                         | .620                         |
|                  | Turkey meat    | <.001   | .546       | .389                         | .766                         |
|                  | Constant       | .007    | 1.361      |                              |                              |

|                   |                |       |       |       |       |
|-------------------|----------------|-------|-------|-------|-------|
| Ceftazidime       | org_conv       | .357  | .580  | .182  | 1.847 |
|                   | Source         | .820  |       |       |       |
|                   | Turkey at farm | .585  | 1.418 | .405  | 4.966 |
|                   | Turkey meat    | .997  | 1.003 | .279  | 3.603 |
|                   | Constant       | <.001 | .014  |       |       |
| Tetracyclin       | org_conv       | <.001 | 4.000 | 2.689 | 5.950 |
|                   | Source         | <.001 |       |       |       |
|                   | Turkey at farm | .042  | 1.436 | 1.013 | 2.033 |
|                   | Turkey meat    | <.001 | 2.052 | 1.457 | 2.890 |
|                   | Constant       | <.001 | .659  |       |       |
| Trimethoprim      | org_conv       | <.001 | 5.048 | 3.013 | 8.458 |
|                   | Source         | <.001 |       |       |       |
|                   | Turkey at farm | <.001 | .301  | .205  | .442  |
|                   | Turkey meat    | <.001 | .464  | .326  | .661  |
|                   | Constant       | .627  | 1.057 |       |       |
| Fully susceptible | org_conv       | <.001 | .191  | .132  | .277  |
|                   | Source         | .060  |       |       |       |
|                   | Turkey at farm | .018  | 1.65  | 1.091 | 2.495 |
|                   | Turkey meat    | .264  | 1.256 | .842  | 1.875 |
|                   | Constant       | .862  | .963  |       |       |
| Multiresistant    | org_conv       | <.001 | 4.122 | 2.691 | 6.313 |
|                   | Source         | .505  |       |       |       |
|                   | Turkey at farm | .247  | .814  | .575  | 1.153 |
|                   | Turkey meat    | .533  | .898  | .640  | 1.260 |
|                   | Constant       | .000  | .218  |       |       |

\* Meropenem and tigecycline were not included in the analysis as no resistant isolates were found. Broilers at farm and conventional were the reference categories.

conv = conventional farming

org = organic farming
