# Supplementary material for: Comparison of Antimicrobial Resistances in Escherichia coli from Conventionally and Organic Farmed Poultry from Germany
Source: MDPI journal article supplement (doi:10.3390/antibiotics11101282), 2022-09-21
Supplement: s1 [file s1]

**Table S2** Comparison of resistance of *E. coli* isolates from organic and conventional husbandry calculated for each of the three different categories.\*

| Substance       | Category                     |          | p-value | Odds ratio    | Lower 95% C.I.<br>for EXP(B) | Upper 95% C.I.<br>for EXP(B) |
|-----------------|------------------------------|----------|---------|---------------|------------------------------|------------------------------|
| Ampicillin      | Turkey at farm               | org_conv | .009    | 2.848         | 1.297                        | 6.253                        |
|                 |                              | Constant | .277    | .667          |                              |                              |
|                 | Turkey meat                  | org_conv | <.001   | 3.054         | 1.935                        | 4.821                        |
|                 |                              | Constant | .002    | .576          |                              |                              |
|                 | Broiler at farm              | org_conv | <.001   | 8.167         | 3.396                        | 19.642                       |
|                 |                              | Constant | .004    | .292          |                              |                              |
| Azithromycin    | Turkey at farm               | org_conv | .790    | .744          | .084                         | 6.592                        |
|                 |                              | Constant | .001    | .034          |                              |                              |
|                 | Turkey meat <sup>a</sup>     |          |         |               |                              |                              |
|                 | Broiler at farm <sup>a</sup> |          |         |               |                              |                              |
| Chloramphenicol | Turkey at farm               | org_conv | .201    | 2.250         | .650                         | 7.791                        |
|                 |                              | Constant | <.001   | .111          |                              |                              |
|                 | Turkey meat                  | org_conv | .013    | 2.230         | 1.182                        | 4.206                        |
|                 |                              | Constant | <.001   | .126          |                              |                              |
|                 | Broiler at farm              | org_conv | .998    | 133654225.888 | <.001                        | .                            |
|                 |                              | Constant | .998    | <.001         |                              |                              |
| Ciprofloxacin   | Turkey at farm               | org_conv | .053    | 2.692         | .987                         | 7.342                        |
|                 |                              | Constant | .001    | .200          |                              |                              |
|                 | Turkey meat                  | org_conv | <.001   | 2.828         | 1.644                        | 4.865                        |
|                 |                              | Constant | <.001   | .196          |                              |                              |
|                 | Broiler at farm              | org_conv | .001    | 7.489         | 2.228                        | 25.169                       |
|                 |                              | Constant | <.001   | .107          |                              |                              |
| Colistin        | Turkey at farm <sup>a</sup>  |          |         |               |                              |                              |
|                 | Turkey meat                  | org_conv | .599    | 1.289         | .5                           | 3.32                         |
|                 |                              | Constant | <.001   | .055          |                              |                              |
|                 | Broiler at farm <sup>a</sup> |          |         |               |                              |                              |
| Cefotaxime      | Turkey at farm               | org_conv | .098    | .213          | .034                         | 1.332                        |
|                 |                              | Constant | <.001   | .071          |                              |                              |
|                 | Turkey meat                  | org_conv | .812    | .851          | .224                         | 3.228                        |
|                 |                              | Constant | <.001   | .031          |                              |                              |
|                 | Broiler at farm <sup>a</sup> |          |         |               |                              |                              |
|                 |                              |          |         |               |                              |                              |
| Gentamicin      | Turkey at farm <sup>a</sup>  |          |         |               |                              |                              |
|                 | Turkey meat                  | org_conv | .251    | 1.768         | .668                         | 4.68                         |
|                 |                              | Constant | <.001   | .047          |                              |                              |
|                 | Broiler at farm              | org_conv | .424    | .404          | .044                         | 3.732                        |
|                 |                              | Constant | .001    | .033          |                              |                              |
|                 |                              |          |         |               |                              |                              |
| Nalidixic acid  | Turkey at farm               | org_conv | .238    | 1.942         | .644                         | 5.85                         |
|                 |                              | Constant | <.001   | .154          |                              |                              |
|                 | Turkey meat                  | org_conv | .016    | 2.111         | 1.151                        | 3.871                        |

|                   |                              |          |       |        |       |        |
|-------------------|------------------------------|----------|-------|--------|-------|--------|
|                   |                              | Constant | <.001 | .145   |       |        |
|                   | Broiler at farm              | org_conv | .002  | 6.629  | 1.972 | 22.286 |
| Sulfamethoxazole  | Turkey at farm               | Constant | <.001 | .107   |       |        |
|                   |                              | org_conv | .091  | 2.250  | .879  | 5.76   |
|                   | Turkey meat                  | Constant | .002  | .250   |       |        |
|                   |                              | org_conv | <.001 | 3.662  | 2.138 | 6.271  |
|                   | Broiler at farm              | Constant | <.001 | .196   |       |        |
|                   |                              | org_conv | <.001 | 13.507 | 4.017 | 45.414 |
| Ceftazidime       | Turkey at farm               | Constant | <.001 | .107   |       |        |
|                   |                              | org_conv | .098  | .213   | .034  | 1.332  |
|                   | Turkey meat                  | Constant | <.001 | .071   |       |        |
|                   |                              | org_conv | .638  | .679   | .135  | 3.415  |
|                   | Broiler at farm <sup>a</sup> |          |       |        |       |        |
| Tetracycline      | Turkey at farm               | Constant | .001  | .200   |       |        |
|                   |                              | org_conv | .002  | 4.804  | 1.768 | 13.051 |
|                   | Turkey meat                  | Constant | <.001 | .367   |       |        |
|                   |                              | org_conv | <.001 | 3.555  | 2.211 | 5.717  |
|                   | Broiler at farm              | org_conv | .003  | 6.274  | 1.866 | 21.098 |
| Trimethoprim      | Turkey at farm               | Constant | <.001 | .154   |       |        |
|                   |                              | org_conv | .238  | 1.942  | .644  | 5.85   |
|                   | Turkey meat                  | Constant | <.001 | .107   |       |        |
|                   |                              | org_conv | <.001 | 4.409  | 2.311 | 8.41   |
|                   | Broiler at farm              | Constant | <.001 | .069   |       |        |
|                   |                              | org_conv | <.001 | 16.021 | 3.756 | 68.343 |
| Fully susceptible | Turkey at farm               | Constant | .715  | 1.143  |       |        |
|                   |                              | org_conv | .002  | .284   | .129  | .623   |
|                   | Turkey meat                  | Constant | .730  | 1.062  |       |        |
|                   |                              | org_conv | <.001 | .249   | .154  | .404   |
|                   | Broiler at farm              | Constant | .024  | 2.444  |       |        |
|                   |                              | org_conv | <.001 | .063   | .027  | .146   |
| Multiresistant    | Turkey at farm               | Constant | .006  | .304   |       |        |
|                   |                              | org_conv | .070  | 2.283  | .936  | 5.57   |
|                   | Turkey meat                  | Constant | <.001 | .196   |       |        |
|                   |                              | org_conv | <.001 | 4.148  | 2.425 | 7.095  |
|                   | Broiler at farm              | Constant | <.001 | .107   |       |        |
|                   |                              | org_conv | <.001 | 8.675  | 2.582 | 29.149 |

\* Meropenem and tigecycline were not included in the analysis as no resistant isolates were found.

<sup>a</sup> For C.I.0 logistic regression was not performed (-)

conv = conventional farming

org = organic farming
